# Supplementary material for: Realizing the high thermoelectric performance of highly preferentially oriented SnSe based nanorods via band alignment
Source: Royal Society of Chemistry journal article supplement (doi:10.1039/d3ee04109c), 2024-01-01
Supplement: d3ee04109c1.pdf [file d3ee04109c1.pdf]

## Supporting Information

### Realizing High Thermoelectric Performance in Highly Preferentially Oriented SnSe based Nanorods via Band Alignment

Yaru Gong,<sup>†,#</sup> Pan Ying,<sup>†,#</sup> Qingtang Zhang,<sup>†</sup> Yuqi Liu,<sup>†</sup> Xinqi Huang,<sup>†</sup> Wei Dou,<sup>†</sup>  
Yujing Zhang,<sup>†</sup> Di Li,<sup>§</sup> Dewei Zhang,<sup>‡</sup> Tao Feng,<sup>||</sup> Meiyu Wang,<sup>⊥,\*</sup> Guang Chen,<sup>†</sup>  
\* Guodong Tang<sup>†,\*</sup>

<sup>†</sup> National Key Laboratory of Advanced Casting Technologies, MIIT Key Laboratory of Advanced Metallic and Intermetallic Materials Technology, Engineering Research Center of Materials Behavior and Design, Ministry of Education, Nanjing University of Science and Technology, Nanjing, 210094, China

<sup>§</sup> Key Laboratory of Materials Physics, Institute of Solid State Physics, Chinese Academy of Sciences, Hefei 230031, China

<sup>‡</sup> School of Materials Science and Engineering, Yancheng Institute of Technology, Jiangsu 221051, China.

<sup>||</sup> School of Materials Science and Engineering, Nanjing University of Science and Technology, Nanjing 210094, China

<sup>⊥</sup> National Laboratory of Solid State Microstructures, Department of Physics, Nanjing University, Nanjing 210093, China.

<sup>#</sup> These authors contributed equally to this work

\* To whom correspondence should be addressed

Email: [tanguodong@njust.edu.cn](mailto:tanguodong@njust.edu.cn) (G. D. Tang)

Email: [gchen@njust.edu.cn](mailto:gchen@njust.edu.cn) (G. Chen)

Email: [mywang@nju.edu.cn](mailto:mywang@nju.edu.cn) (M. Y. Wang)

## Lorentz number calculation in details:

In general, the total ( $\kappa$ ) consists of the electronic thermal conductivity ( $\kappa_e$ ) and lattice thermal conductivity ( $\kappa_L$ ). The electronic part  $\kappa_e$  is directly proportional to the electrical conductivity  $\sigma$  through the Wiedemann-Franz relation,  $\kappa_e = L\sigma T$ , where  $L$  is Lorentz number and its value is calculated by SPB model. The Lorentz number can be given as: <sup>1,2</sup>

$$L = \frac{k_B^2}{e^2} \left( \frac{(r+3)F_{r+2}(\eta)}{(r+1)F_r(\eta)} - \left[ \frac{(r+2)F_{r+1}(\eta)}{(r+1)F_r(\eta)} \right]^2 \right) \quad (1)$$

For the Lorentz number calculation, we should get reduced Fermi energy  $\eta$  firstly. The calculation of  $\eta$  can be derived from the measured Seebeck coefficients by using the following relationship:

$$S = \pm \frac{k_B}{e} \left( \frac{(r+2)F_{r+1}(\eta)}{(r+1)F_r(\eta)} - \eta \right) \quad (2)$$

where  $F_n(\eta)$  is the  $n$ -th order Fermi integral,

$$F_n(\eta) = \int_0^{\infty} \frac{\chi^n}{1 + e^{\chi - \eta}} d\chi \quad (3)$$

where  $e$  is the electron charge,  $k_B$  is the Boltzmann constant,  $h$  is the Planck constant,  $r$  is the scattering factor. Here,  $r$  is 0 since acoustic phonon scattering has been assumed as the main carrier scattering mechanism near room temperature (RT). Lorentz number can be obtained by combining equations (1), (2) and (3).

**Table S1.** Rietveld refinement details of the  $\text{Sn}_{0.96}\text{Ge}_{0.04}\text{Se}_{0.96}\text{S}_{0.04}$ .

| <b>Atom</b> | <b>Site</b> | <b>x</b> | <b>y</b> | <b>z</b> | <b>Occupancy</b> | <b>FWHM<br/>(111)</b> |
|-------------|-------------|----------|----------|----------|------------------|-----------------------|
| Sn          | 4c          | -0.3812  | 0.2500   | 0.3995   | 0.48             | 0.1668                |
| Ge          | 4c          | -0.3812  | 0.2500   | 0.3995   | 0.02             |                       |
| Se          | 4c          | 0.3607   | 0.2500   | 0.0153   | 0.48             |                       |
| S           | 4c          | 0.3607   | 0.2500   | 0.0153   | 0.02             |                       |

**Table S2.** Lattice parameters for  $\text{Sn}_{1-x}\text{Ge}_x\text{Se}_{1-x}\text{S}_x$  ( $x=0, 0.02, 0.04, 0.05$ ).

| <b>Compositions</b> | <b>a (Å)</b> | <b>b (Å)</b> | <b>c (Å)</b> | <b>Volume (Å<sup>3</sup>)</b> |
|---------------------|--------------|--------------|--------------|-------------------------------|
| SnSe                | 11.50856     | 4.15772      | 4.43934      | 212.42                        |
| x=0.02              | 11.50585     | 4.15102      | 4.43975      | 212.05                        |
| x=0.04              | 11.49681     | 4.15403      | 4.43467      | 211.79                        |
| x=0.05              | 11.49733     | 4.15067      | 4.44046      | 211.91                        |

**Table S3.** The calculated and measured densities for pure SnSe and  $\text{Sn}_{1-x}\text{Ge}_x\text{Se}_{1-x}\text{S}_x$  nanorods.

| Compositions | Theoretical Density            | Actual Density                 | Density |
|--------------|--------------------------------|--------------------------------|---------|
|              | ( $\rho$ , g/cm <sup>3</sup> ) | ( $\rho$ , g/cm <sup>3</sup> ) | %       |
| SnSe         | 6.19                           | 6.03                           | 97.42   |
| x=0.02       | 6.16                           | 5.89                           | 95.62   |
| x=0.04       | 6.13                           | 5.86                           | 95.60   |
| x=0.05       | 6.11                           | 5.78                           | 94.60   |

**Figure S1.** SEM images of pristine SnSe synthesized by the same method. Microplates can be clearly observed.

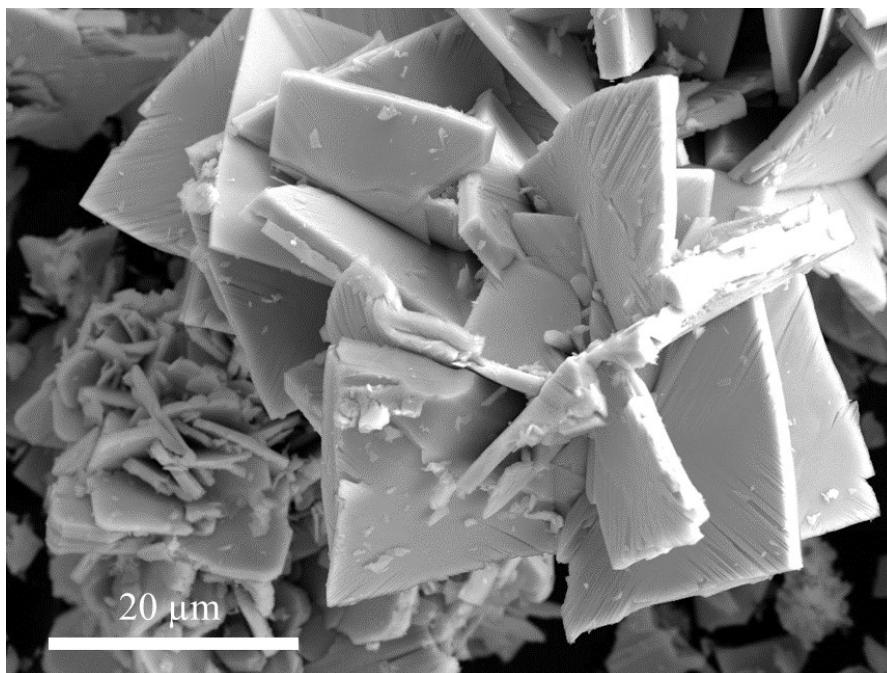

**Figure. S2.** SEM of  $\text{Sn}_{0.96}\text{Ge}_{0.04}\text{Se}_{0.96}\text{S}_{0.04}$  nanorods and Elemental mapping.

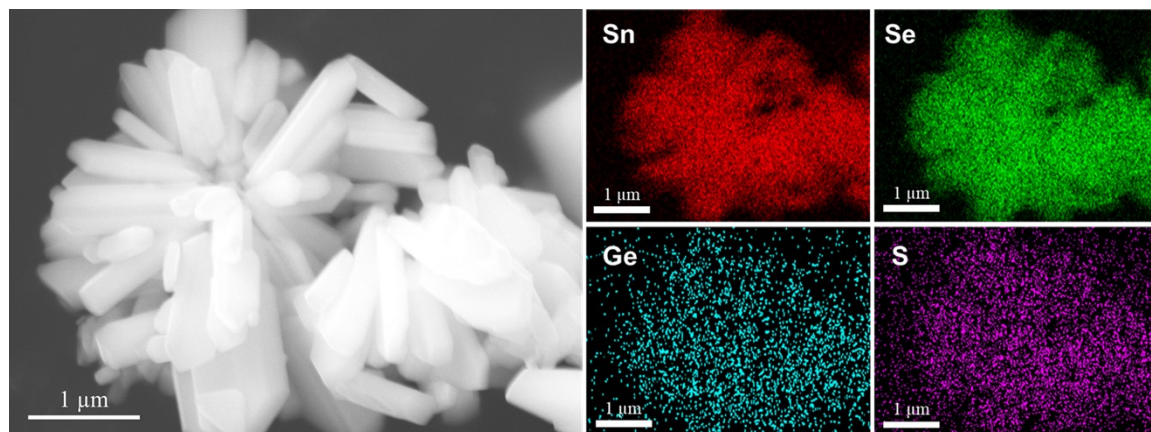



**Figure S3.** XPS core-level spectra of (a)  $\text{Sn}^{2+}$  3d, (b)  $\text{Se}^{2-}$  3d peak from  $\text{Sn}_{0.96}\text{Ge}_{0.04}\text{Se}_{0.96}\text{S}_{0.04}$  nanorods.

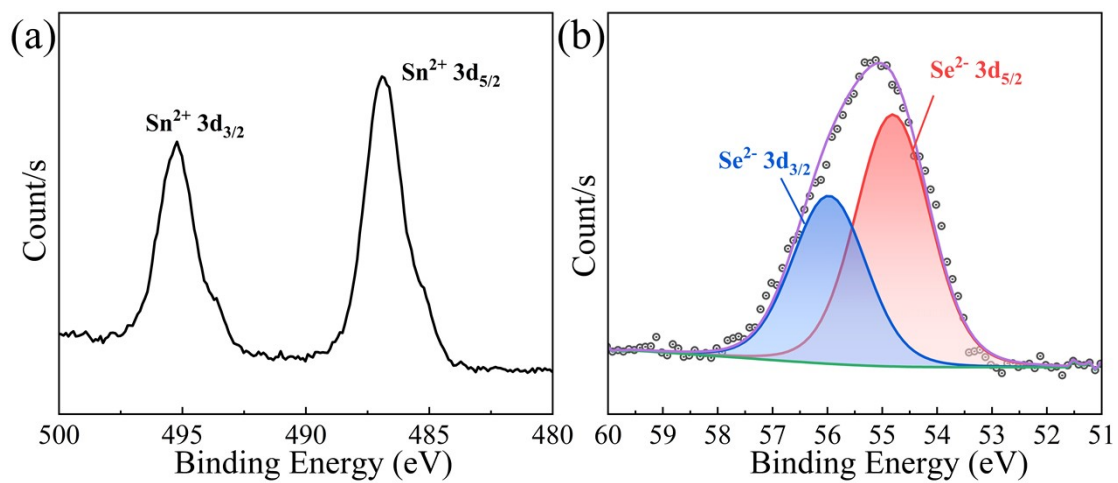

**Figure S4.** XRD patterns of SnSe and  $\text{Sn}_{0.96}\text{Ge}_{0.04}\text{Se}_{0.96}\text{S}_{0.04}$  parallel to the pressure direction (//) and perpendicular to the pressure direction ( $\perp$ ).

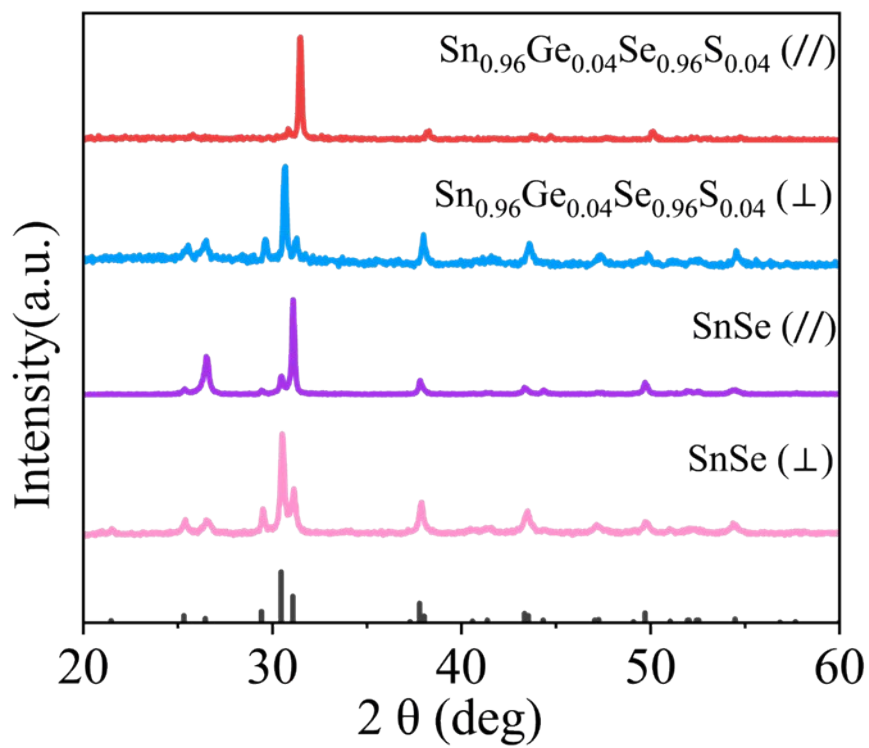

**Figure S5.** (a) Electronic thermal conductivity ( $\kappa_c$ ), (b) Lorenz number for  $\text{Sn}_{1-x}\text{Ge}_x\text{Se}_{1-x}\text{S}_x$  nanorods as a function of temperature.

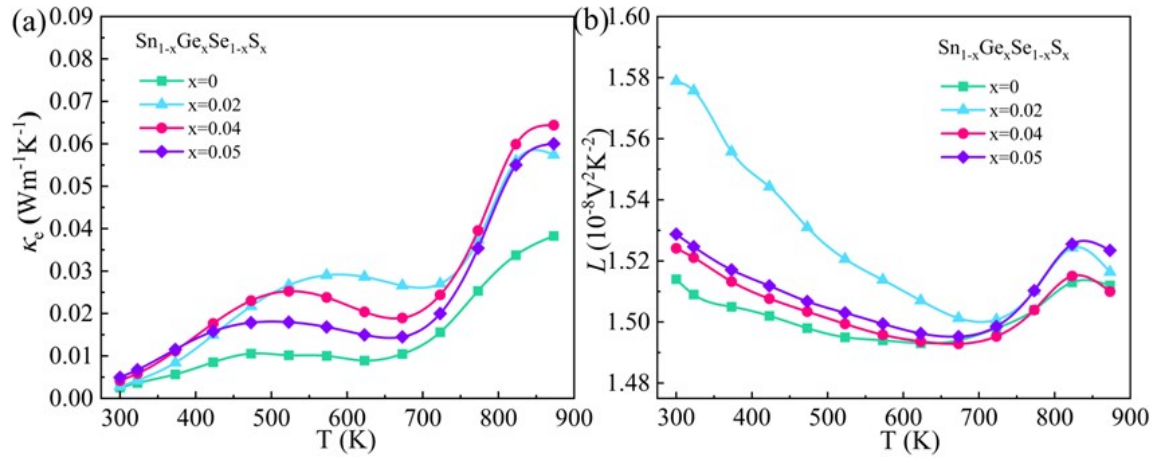

**Figure S6.** Comparison of Seebeck coefficient of  $\text{Sn}_{1-x}\text{Ge}_x\text{Se}_{1-x}\text{S}_x$  nanorods with other reported SnSe-based materials.

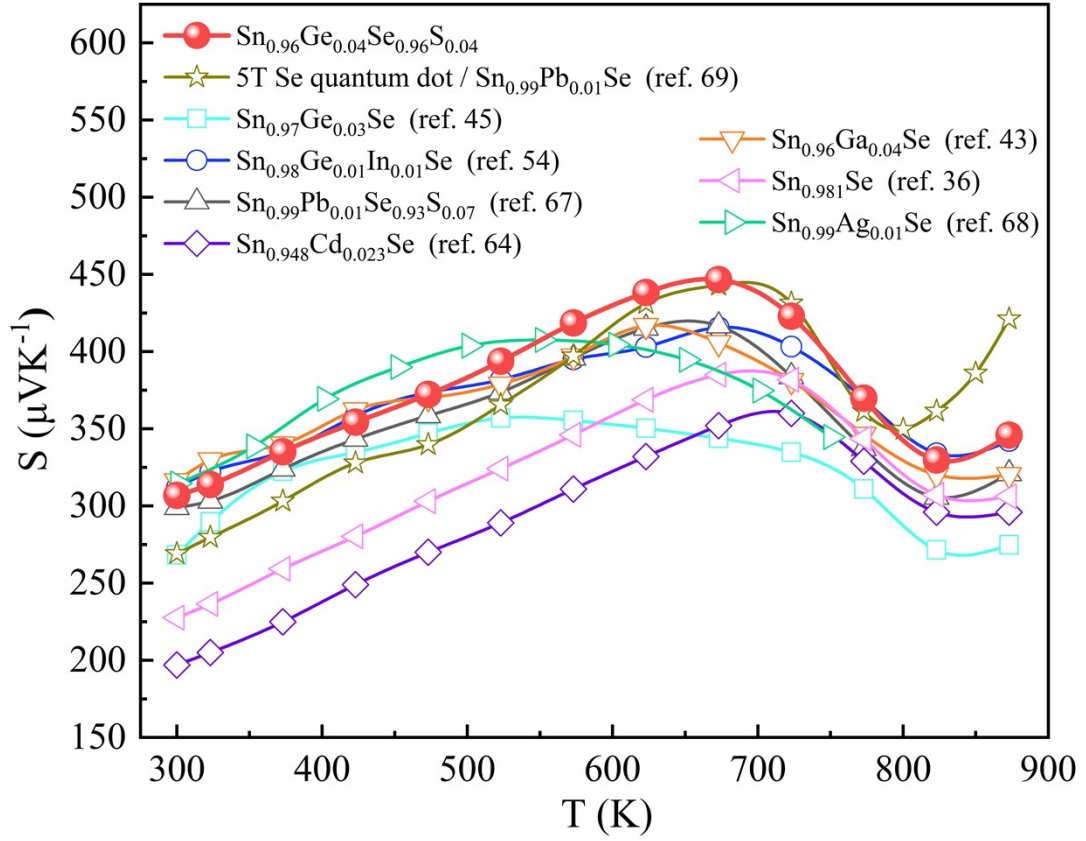

**Figure S7.** Electronic density of states of  $\text{Sn}_{24}\text{Se}_{24}$ ,  $\text{Sn}_{24}\text{Se}_{23}\text{S}$ ,  $\text{Sn}_{23}\text{GeSe}_{24}$  and  $\text{Sn}_{23}\text{GeSe}_{23}\text{S}$ .

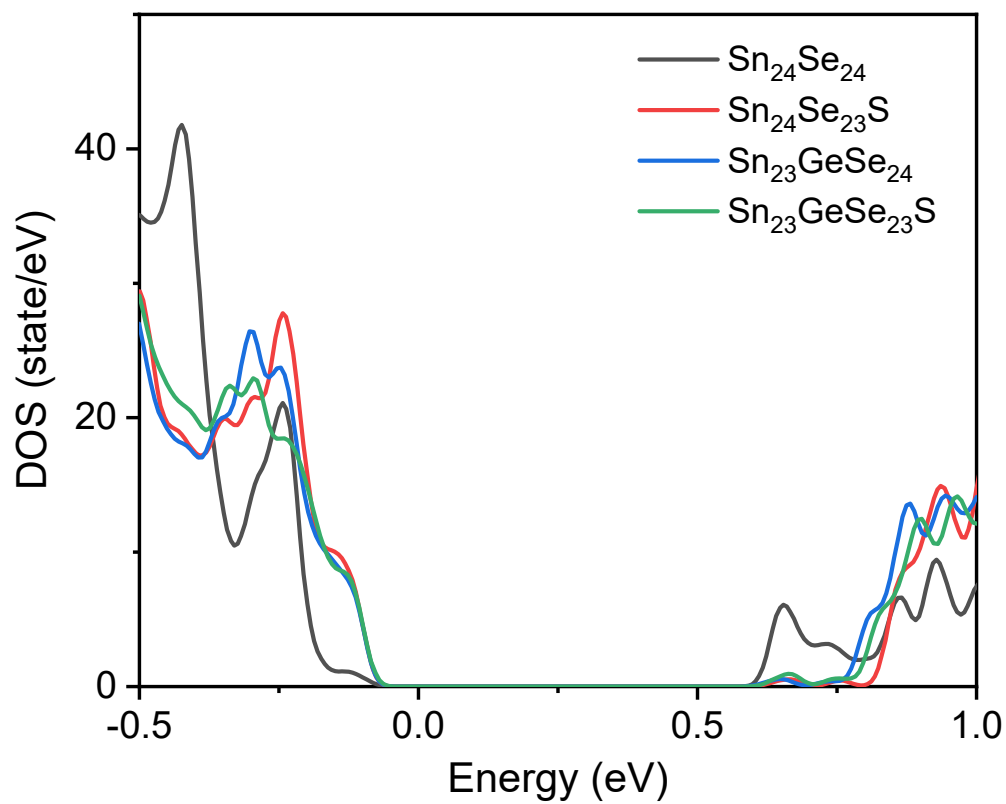

**Figure S8.** Comparison of  $PF$  for  $\text{Sn}_{0.96}\text{Ge}_{0.04}\text{Se}_{0.96}\text{S}_{0.04}$  nanorods with SnSe-based systems.

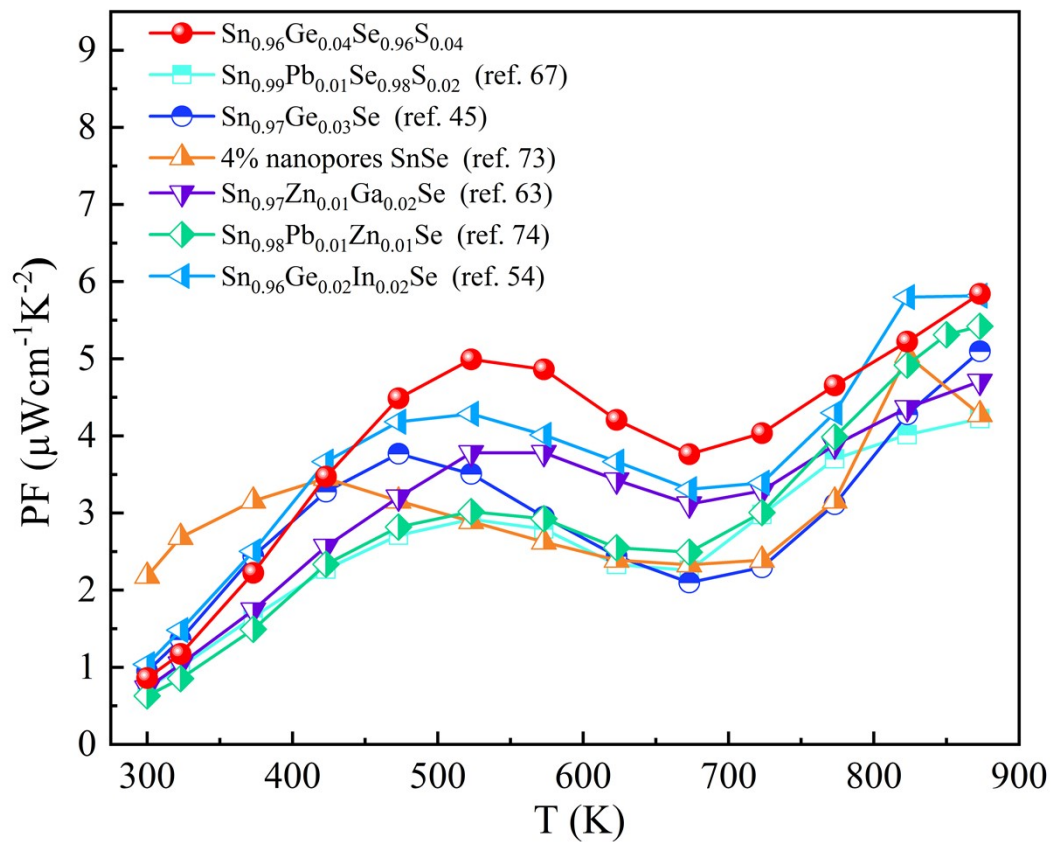

**Figure S9.** Repeat measurement results of (a) electrical conductivity, (b) Seebeck coefficient, (c) thermal conductivity, (d)  $ZT$  of  $\text{Sn}_{0.96}\text{Ge}_{0.04}\text{Se}_{0.96}\text{S}_{0.04}$ .

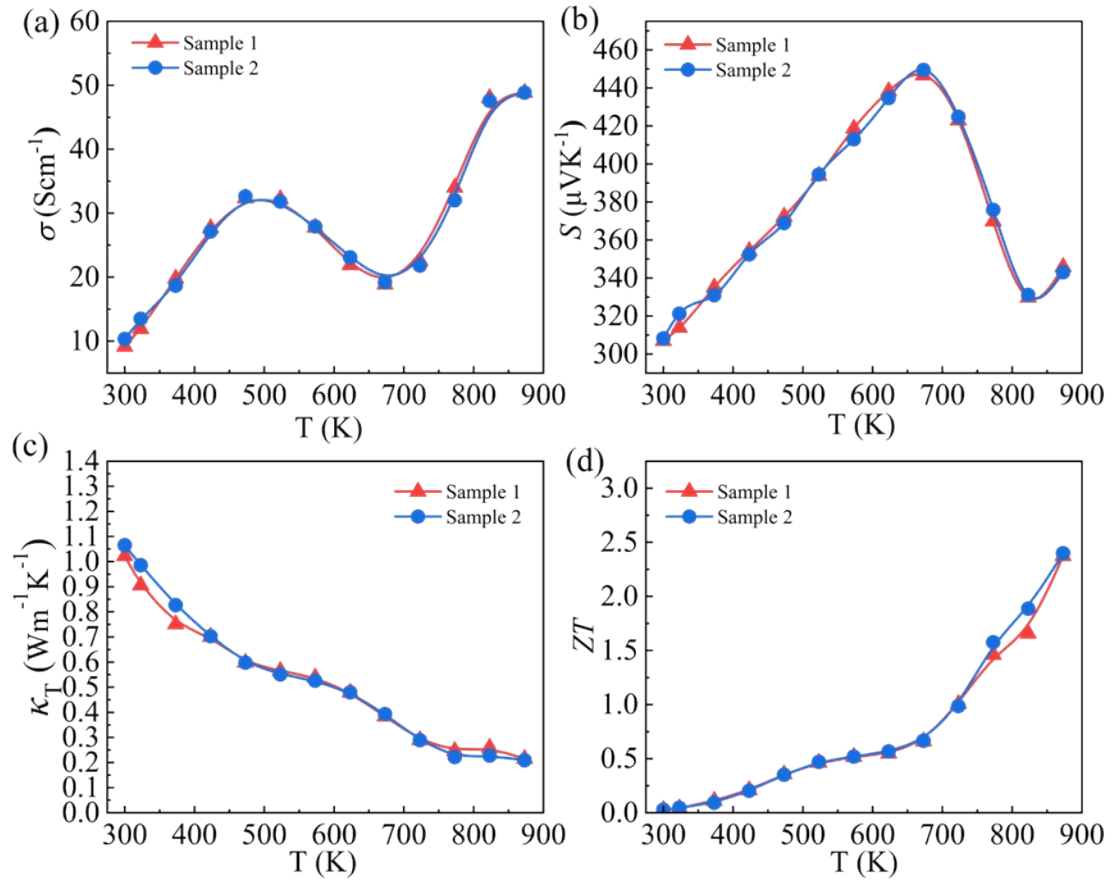

**Figure S10.** XRD patterns for  $\text{Sn}_{0.96}\text{Ge}_{0.04}\text{Se}_{0.96}\text{S}_{0.04}$  nanorods before and after repetitive measurements.

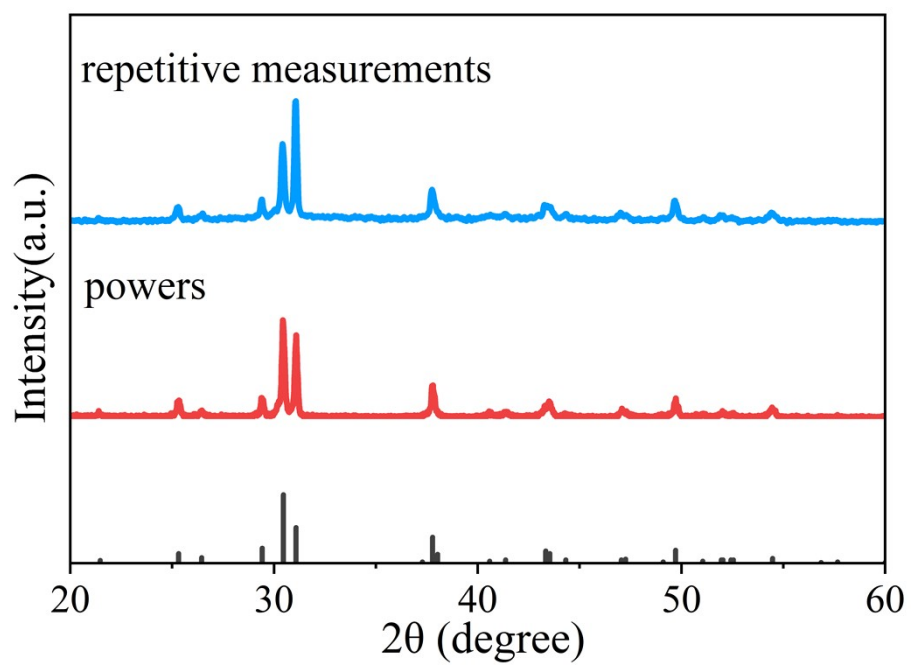



**Figure S11.** (a) Electrical conductivity ( $\sigma$ ), (b) Seebeck coefficient ( $S$ ), (c) Power factor ( $PF$ ), (d) Total thermal conductivity ( $\kappa_T$ ), (e) Lattice thermal conductivity ( $\kappa_L$ ), (f)  $ZT$  for  $\text{Sn}_{0.96}\text{Ge}_{0.04}\text{Se}_{0.96}\text{S}_{0.04}$  nanorods along the pressing direction ( $//$ ) and perpendicular to the pressing direction ( $\perp$ ).

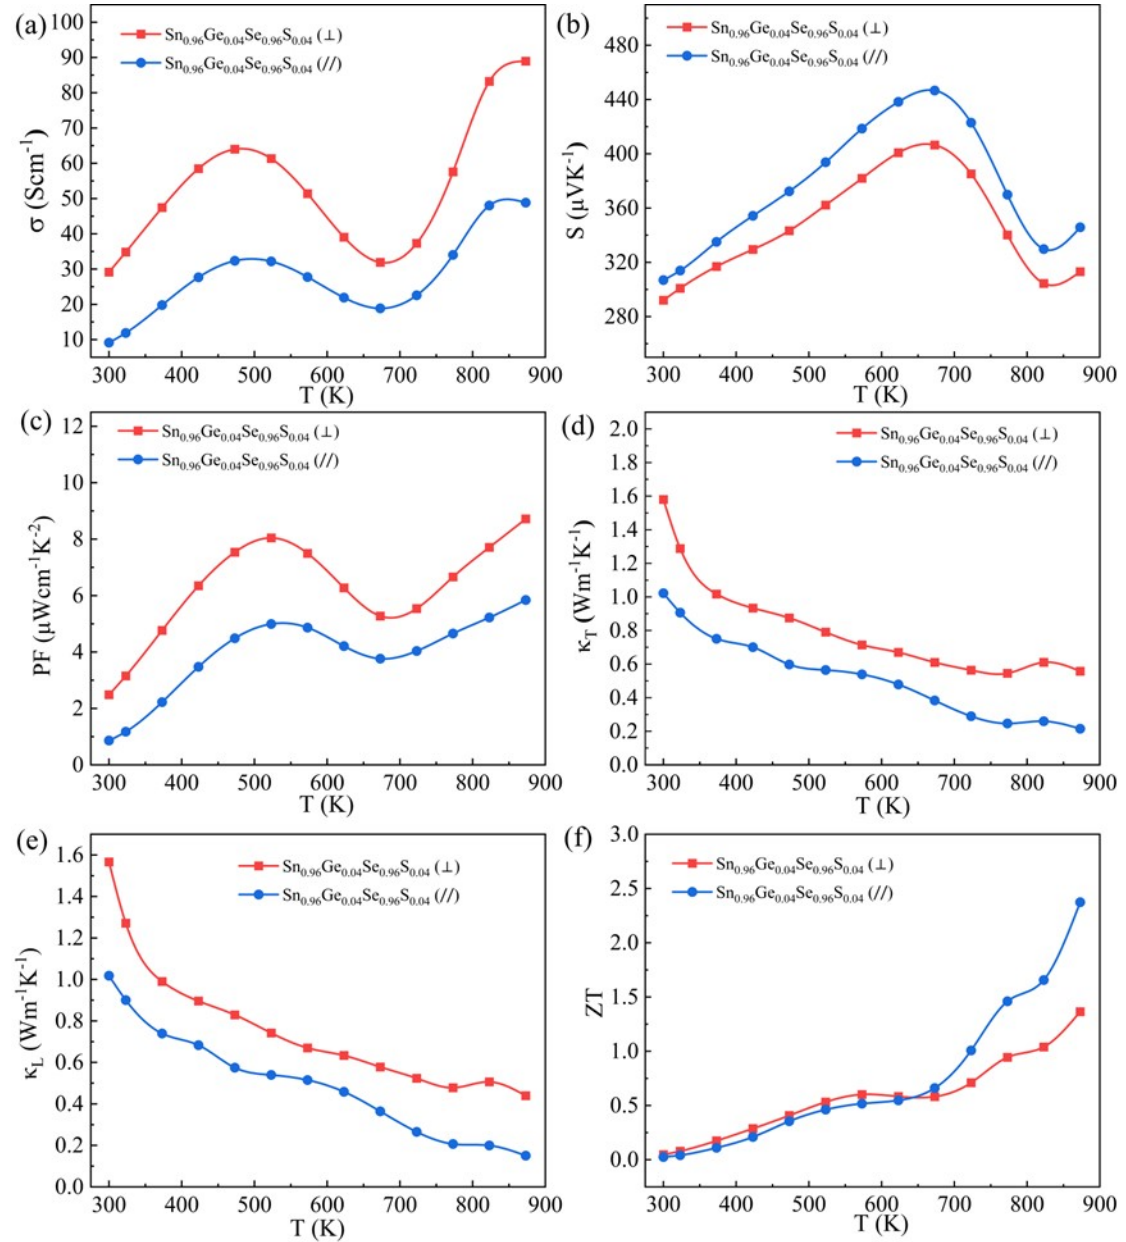

**Figure S12.** The  $C_p$  used for the ZT calculation.<sup>3</sup>

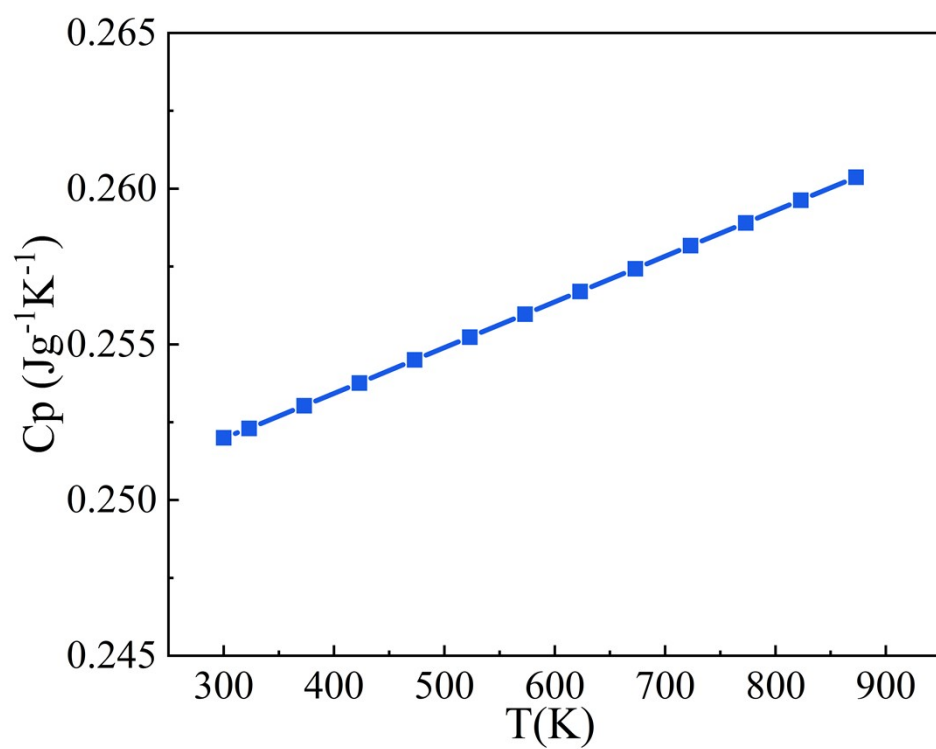

## Reference

1. W. G. Zeier, A. LaLonde, Z. M. Gibbs, C. P. Heinrich, M. Panthoefler, G. J. Snyder, W. Tremel. *J. Am. Chem. Soc.* 2012, **134**, 7147-7154
2. A. F. May, E. S. Toberer, A. Saramat, G. J. Snyder. *Phys. Rev. B* 2009, **80**, 125205.
3. L.-D. Zhao, S.-H. Lo, Y. Zhang, H. Sun, G. Tan, C. Uher, C. Wolverton, V. P. Dravid, M. G. Kanatzidis. *Nature* 2014, **508**, 373-377.
